# Supplementary material
Source: ML conference proceedings conference paper supplement (https://openreview.net/forum?id=10NjidPHxY)
Supplement: supplementary_material [file attachment]

# Lang2LTL-2: Grounding Spatiotemporal Navigation Commands Using Large Language and Vision-Language Models Supplementary Material

Jason Xinyu Liu<sup>1</sup>, Ankit Shah<sup>1</sup>, George Konidaris<sup>1</sup>, Stefanie Tellex<sup>1</sup>, and David Paulius<sup>1</sup>

<sup>1</sup>Brown University

## I. SPATIAL RELATIONS

We define the following spatial relations and rules for the spatial referring expression recognition (SRER) and the spatial predicate grounding (SPG) module.  $\vec{v}_f$  and  $\vec{v}_g$  represent the figure (from the ground landmark to the figure landmark) and the ground vector (from the ground landmark to the robot), respectively.

TABLE I: Spatial Relations and Corresponding Rules.

| Relation     | Rule                                                    |
|--------------|---------------------------------------------------------|
| left         | $\vec{v}_f \in [\vec{v}_g - \pi, \vec{v}_g]$            |
| right        | $\vec{v}_f \in [\vec{v}_g, \vec{v}_g + \pi]$            |
| in front of  | $\vec{v}_f \in [\vec{v}_g - \pi/2, \vec{v}_g + \pi/2]$  |
| opposite to  | $\vec{v}_f \in [\vec{v}_g - \pi/2, \vec{v}_g + \pi/2]$  |
| behind       | $\vec{v}_f \in [\vec{v}_g - 3\pi/2, \vec{v}_g - \pi/2]$ |
| near         | $\vec{v}_f \in [\vec{v}_g - \pi, \vec{v}_g + \pi]$      |
| next to      | $\vec{v}_f \in [\vec{v}_g - \pi, \vec{v}_g + \pi]$      |
| adjacent to  | $\vec{v}_f \in [\vec{v}_g - \pi, \vec{v}_g + \pi]$      |
| close to     | $\vec{v}_f \in [\vec{v}_g - \pi, \vec{v}_g + \pi]$      |
| by           | $\vec{v}_f \in [\vec{v}_g - \pi, \vec{v}_g + \pi]$      |
| north of     | $\vec{v}_f \in [0, \pi]$                                |
| south of     | $\vec{v}_f \in [\pi, 2\pi]$                             |
| east of      | $\vec{v}_f \in [-\pi/2, \pi/2]$                         |
| west of      | $\vec{v}_f \in [\pi/2, 3\pi/2]$                         |
| northeast of | $\vec{v}_f \in [0, \pi/2]$                              |
| northwest of | $\vec{v}_f \in [\pi/2, \pi]$                            |
| southeast of | $\vec{v}_f \in [\pi, 3\pi/2]$                           |
| southwest of | $\vec{v}_f \in [3\pi/2, 2\pi]$                          |

The rule for the spatial relation between is that the figure landmark must lie between the two parallel lines perpendicular to the vector connecting and passing through the two grounding landmarks.

## II. DETAILS ABOUT SPATIAL REFERRING EXPRESSION RECOGNITION (SRER)

The prompt for the spatial referring expression recognition (SRER) module is as follows,

Your task is to repeat exact strings from the given utterance which possibly refer to certain propositions.

Utterance: move to red room

Propositions: red room

Utterance: visit Cutler Majestic Theater

Propositions: Cutler Majestic Theater

Utterance: robot c move to big red room and then move to green area

Propositions: big red room | green area

Utterance: you have to visit Panera Bread on Beacon Street, four or more than four times Propositions: Panera Bread on Beacon Street

Utterance: go to Cutler Majestic Theater at Emerson College on Tremont Street, exactly three times

Propositions: Cutler Majestic Theater at Emerson College on Tremont Street

...

Utterance: make sure you never visit St. James Church, a Christian place of worship on Harrison Avenue, Dunkin' Donuts, Thai restaurant Montien, New Saigon Sandwich, or Stuart St @ Tremont St

Propositions: St. James Church, a Christian place of worship on Harrison Avenue | Dunkin' Donuts | Thai restaurant Montien | New Saigon Sandwich | Stuart St @ Tremont St

Utterance: move the robot through yellow region or small red room and then to large green room

Propositions: yellow region | small red room | large green room

Utterance:

## III. DETAILS ABOUT LIFTED TRANSLATION (LT)

The prompt to GPT-4 for translating the lift command “navigate to a at most twice” using retrieval augmented generation (RAG) with 10 in-context examples is as follows,

Command: navigate to a exactly twice

LTL formula:  $M \ \& \ a \ F \ \& \ ! \ a \ F \ a \mid ! \ a \ G \mid a \ G \mid ! \ a \ G \mid a \ G \mid ! \ a$

Command: navigate to a exactly three times

LTL formula:  $M \ \& \ a \ F \ \& \ ! \ a \ F \ \& \ a \ F \ \& \ ! \ a \ F \ a \mid ! \ a \ G \mid a \ G \mid ! \ a \ G \mid a \ G \mid ! \ a \ G \mid a \ G \mid ! \ a \ G \mid a \ G \mid ! \ a$

Command: navigate to a exactly once

LTL formula:  $M \ a \mid ! \ a \ G \mid a \ G \mid ! \ a$

Command: visit a at most twice

LTL formula:  $! \ F \ \& \ a \ U \ a \ \& \ ! \ a \ U \ ! \ a \ F \ \& \ a \ U \ a \ \& \ ! \ a \ U \ ! \ a \ F \ a$

Command: go to a at most twice

LTL formula:  $! \ F \ \& \ a \ U \ a \ \& \ ! \ a \ U \ ! \ a \ F \ \& \ a \ U \ a \ \& \ ! \ a \ U \ ! \ a \ F \ a$

Command: navigate to a exactly five times

LTL formula:  $M \ \& \ a \ F \ \& \ ! \ a \ F \ \& \ a \ F \ \& \ ! \ a \ F \ \& \ a \ F \ \& \ ! \ a \ F \ \& \ a \ F \ a \mid ! \ a \ G \mid a \ G \mid ! \ a \ G \mid a \ G \mid ! \ a \ G \mid a \ G \mid ! \ a \ G \mid a \ G \mid ! \ a \ G \mid a \ G \mid ! \ a \ G \mid a \ G \mid ! \ a \ G \mid a \ G \mid ! \ a \ G \mid a \ G \mid ! \ a$

Command: navigate to a exactly four times

LTL formula:  $M \ \& \ a \ F \ \& \ ! \ a \ F \ \& \ a \ F \ \& \ ! \ a \ F \ \& \ a \ F \ \& \ ! \ a \ F \ \& \ a \ F \ a \mid ! \ a \ G \mid a \ G \mid ! \ a \ G \mid a \ G \mid ! \ a \ G \mid a \ G \mid ! \ a \ G \mid a \ G \mid ! \ a \ G \mid a \ G \mid ! \ a \ G \mid a \ G \mid ! \ a \ G \mid a \ G \mid ! \ a$

Command: you can go to a at most twice

LTL formula:  $! \ F \ \& \ a \ U \ a \ \& \ ! \ a \ U \ ! \ a \ F \ \& \ a \ U \ a \ \& \ ! \ a \ U \ ! \ a \ F \ a$

Command: you can visit a at most twice

LTL formula:  $! \ F \ \& \ a \ U \ a \ \& \ ! \ a \ U \ ! \ a \ F \ \& \ a \ U \ a \ \& \ ! \ a \ U \ ! \ a \ F \ a$

Command: you can visit a at most twice

LTL formula:  $! \ F \ \& \ a \ U \ a \ \& \ ! \ a \ U \ ! \ a \ F \ \& \ a \ U \ a \ \& \ ! \ a \ U \ ! \ a \ F \ a$

Command:

#### IV. LANGUAGE COMMANDS FOR ROBOT DEMONSTRATION

Table II and III contain language commands and language grounding results for robot demonstrations in indoor and outdoor environments, respectively.

TABLE II: Commands for Robot Demonstration in Indoor Environment

| Navigational Command                                                                                                                                                                                                                       | Lang2LTL-2 Result              |
|--------------------------------------------------------------------------------------------------------------------------------------------------------------------------------------------------------------------------------------------|--------------------------------|
| 1.                                                                                                                                                                                                                                         | success                        |
| 2. go to the couch in front of the TV, the couch to the left of the kitchen counter, the kitchen counter between the couch and the refrigerator, the table next to the door, and the chair on the left of the bookshelf in any order       | success                        |
| 3. move to the couch in front of the TV, then the couch to the left of the kitchen counter, then the refrigerator right of the kitchen counter, then the table to the left of the bookshelf, then the table next to the door               | success                        |
| 4. walk to the chair in front of the bookshelf but only after the kitchen counter                                                                                                                                                          | success                        |
| 5. move from the red couch near the TV to the blue couch left of the kitchen counter and only visit each landmark one time                                                                                                                 | success                        |
| 6. go to the kitchen counter on the left side of the fridge exactly once and do not visit the kitchen counter on the left side of the fridge before the couch left of the TV                                                               | success                        |
| 7. patrol the fridge right of kitchen counter at least five times                                                                                                                                                                          | success                        |
| 8. go to the kitchen counter between the blue couch and the fridge at most three times                                                                                                                                                     | success                        |
| 9. visit the couch left of the counter, in addition never go to the TV in front of the couch                                                                                                                                               | success                        |
| 10. visit the blue couch near the kitchen counter then go to the fridge near the counter, in addition never visit the couch in front of the TV                                                                                             | success                        |
| 11. visit the blue couch near the kitchen counter then go to the fridge near the counter, in addition never visit the couch in front of the TV or the kitchen counter                                                                      | success                        |
| 12. go to the refrigerator right of the kitchen counter, and only then go to the couch left of counter, in addition always avoid the couch in front of the TV                                                                              | success                        |
| 13. go to the refrigerator near the kitchen counter then the couch left of the kitchen counter then the couch in front of the TV, in addition after going to the refrigerator near the kitchen counter, you must avoid the kitchen counter | success                        |
| 14. go to the blue couch near the kitchen counter then the red couch in front of the TV, in addition go to the red couch in front of the TV only after visiting the refrigerator                                                           | success                        |
| 15. go to the table near the door then the blue couch next to the kitchen counter then the red couch in front of the TV, in addition go to the table near the door only after visiting the bookshelf                                       | success                        |
| 16. go to the kitchen counter between the couch and fridge only after visiting the couch next to the counter, in addition go to the couch next to the counter only after visiting the refrigerator                                         | success                        |
| 17. go to the kitchen counter between the couch and the refrigerator exactly two times, in addition always avoid the TV in front of the couch                                                                                              | success                        |
| 18. go to the bookshelf exactly two times, in addition always avoid the TV in front of the couch and the chair near the bookshelf                                                                                                          | success                        |
| 19. visit the couch next to the kitchen counter exactly two times, in addition do not go to the couch next to the kitchen counter before the couch near the TV                                                                             | success                        |
| 20. visit the couch in front of the TV at least two times, in addition do not go to the couch in front of the TV before the kitchen counter between the blue couch and the fridge                                                          | success                        |
| 21. go to the refrigerator near the kitchen counter then the couch in front of the TV, in addition you must go to the couch left of the kitchen counter exactly twice                                                                      | success                        |
| 22. go to the blue couch next to the kitchen counter but never go to the blue couch next to the kitchen counter                                                                                                                            | unsatisfiable. abort correctly |
| 23. go to the kitchen counter between the refrigerator and the blue couch at least twice, in addition go to the kitchen counter between the refrigerator and the blue couch exactly once                                                   | unsatisfiable. abort correctly |
| 24. do not go to the desk near the door until the bookshelf, and do not go to the bookshelf until the desk near the door                                                                                                                   | unsatisfiable. abort correctly |
| 25. find the kitchen counter between the refrigerator and the blue couch, in addition always avoid the red couch and the TV                                                                                                                | unsatisfiable. abort correctly |

TABLE III: Commands for Robot Demonstration in Outdoor Environment

| Navigational Command                                                                                                                                                                       | Lang2LTL-2 Result              |
|--------------------------------------------------------------------------------------------------------------------------------------------------------------------------------------------|--------------------------------|
| 1. go to the stairs between the apartment building and the silver car                                                                                                                      | success                        |
| 2. go to the stairs in front of the apartment building,<br>the car to the right of the apartment and the car to the left of the apartment in any order                                     | success                        |
| 3. go to the white car to the right of the apartment, then visit the silver car near the stairs                                                                                            | success                        |
| 4. move to the car east of the apartment, then the car west of the apartment,<br>then dumpster north of the apartment, then red brick building north of the apartment                      | success                        |
| 5. walk to the stairs between the apartment and the silver car, then the white car near the dumpster, then the dumpster                                                                    | success                        |
| 6. navigate to the dumpster north of the white car<br>but do not visit the dumpster north of the white car before the stairs near the apartment                                            | success                        |
| 7. visit the the white car on the right side of the apartment<br>but do not visit the white car on the right side of the apartment before the silver car on the east side of the apartment | success                        |
| 8. only visit the apartment once, and do not visit the apartment until you visit the white car west of the apartment first                                                                 | success                        |
| 9. walk to the stairs in front of the apartment at least five times                                                                                                                        | success                        |
| 10. visit the stairs between the apartment and the silver car at most three times                                                                                                          | success                        |
| 11. visit the silver car on the left side of the apartment exactly twice                                                                                                                   | success                        |
| 12. go to the dumpster near the white car, in addition avoid the red brick building north of the apartment                                                                                 | success                        |
| 13. go to the stairs between the silver car and the apartment then the apartment,<br>in addition do not visit the dumpster north of the apartment                                          | success                        |
| 14. go to the white car left to the apartment and the silver car right to the apartment,<br>in addition avoid the red brick building north of the apartment                                | success                        |
| 15. move to the white car near the apartment at most twice,<br>in addition avoid the dumpster near the white car                                                                           | success                        |
| 16. go to the white car near the dumpster exactly three times,<br>in addition avoid stairs in front of the apartment                                                                       | success                        |
| 17. visit the dumpster near the white car,<br>in addition you are not permitted to visit the apartment and the stairs between the apartment and silver car                                 | success                        |
| 18. navigate to the apartment at least two different occasions,<br>in addition you are only permitted to visit the white car near the apartment at most once                               | success                        |
| 19. walk to the white car close to the dumpster exactly once,<br>in addition visit the stairs in front of the apartment on at least 2 separate occasions                                   | success                        |
| 20. visit the silver car east of the apartment exactly twice,<br>in addition visit the red brick building in front of the apartment on at least 3 separate occasions                       | success                        |
| 21. move to the stairs in front of the apartment then the apartment,<br>in addition visit the white car near the dumpster exactly once                                                     | unsatisfiable. abort correctly |
| 22. Visit the white car, then go to the red brick wall and then go to the silver car near the apartment,<br>in addition you can never go to the apartment once you've seen the white car   | unsatisfiable. abort correctly |
| 23. go to the dumpster on the north side of the apartment,<br>but always avoid the dumpster on the north side of the apartment                                                             | unsatisfiable. abort correctly |
| 24. do not go to the white car west of the apartment until the red brick wall,<br>and do not go to the red brick wall until the white car west of the apartment                            | unsatisfiable. abort correctly |
| 25. find the dumpster near the white car, in addition avoid visiting the apartment and the red brick wall                                                                                  | unsatisfiable. abort correctly |
